# Supplementary material for: Model-based understanding of single-cell CRISPR screening
Source: PubMed Central journal article supplement (PMC6527552; doi:10.1038/s41467-019-10216-x), 2019-05-20
Supplement: 41467_2019_10216_MOESM1_ESM.pdf [file 41467_2019_10216_MOESM1_ESM.pdf]

**Supplementary Information for**  
**Model-based Understanding of Single-cell CRISPR screening**

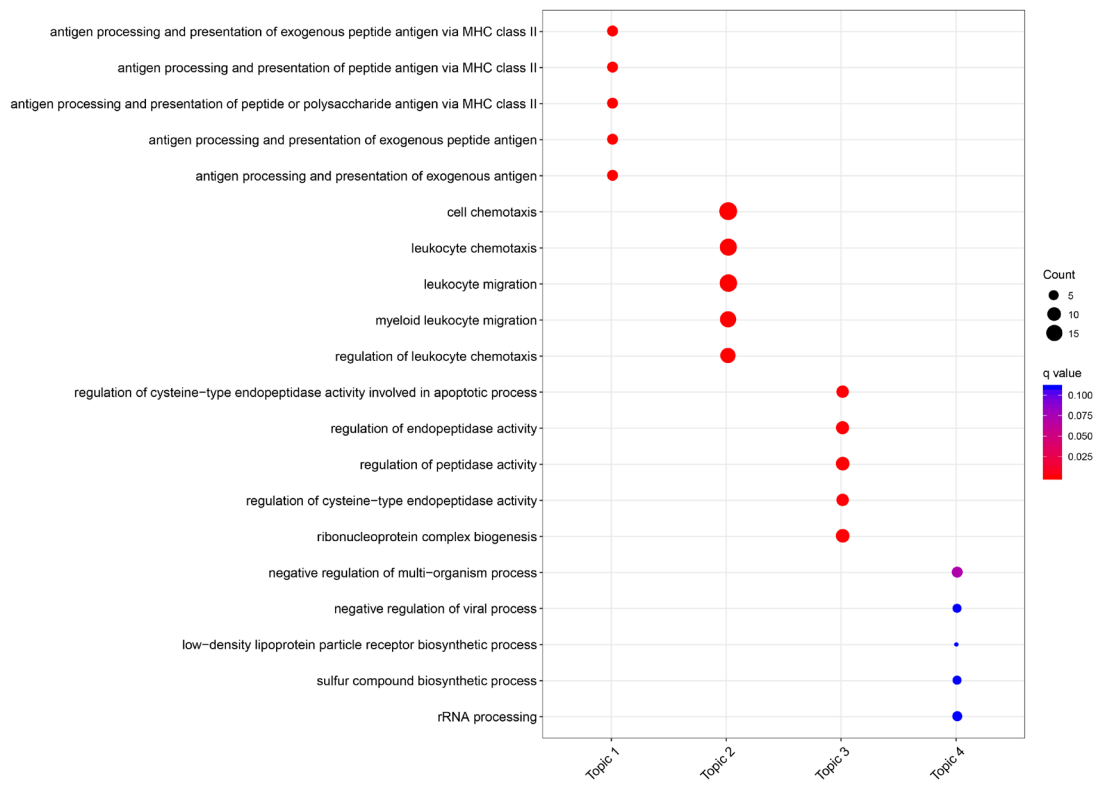

**Supplementary Figure 1** Functional annotation of topics for stimulated BMDC (GSM2396856).

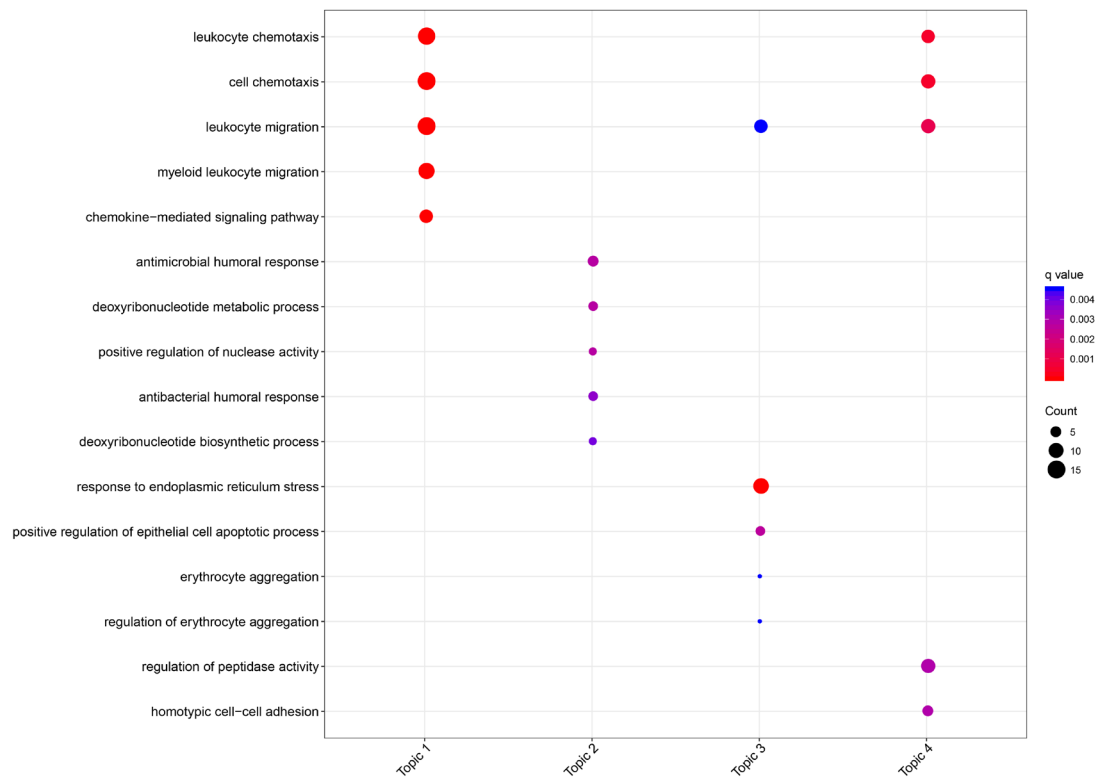

**Supplementary Figure 2** Functional annotation of topics for unstimulated BMDC (GSM2396857).

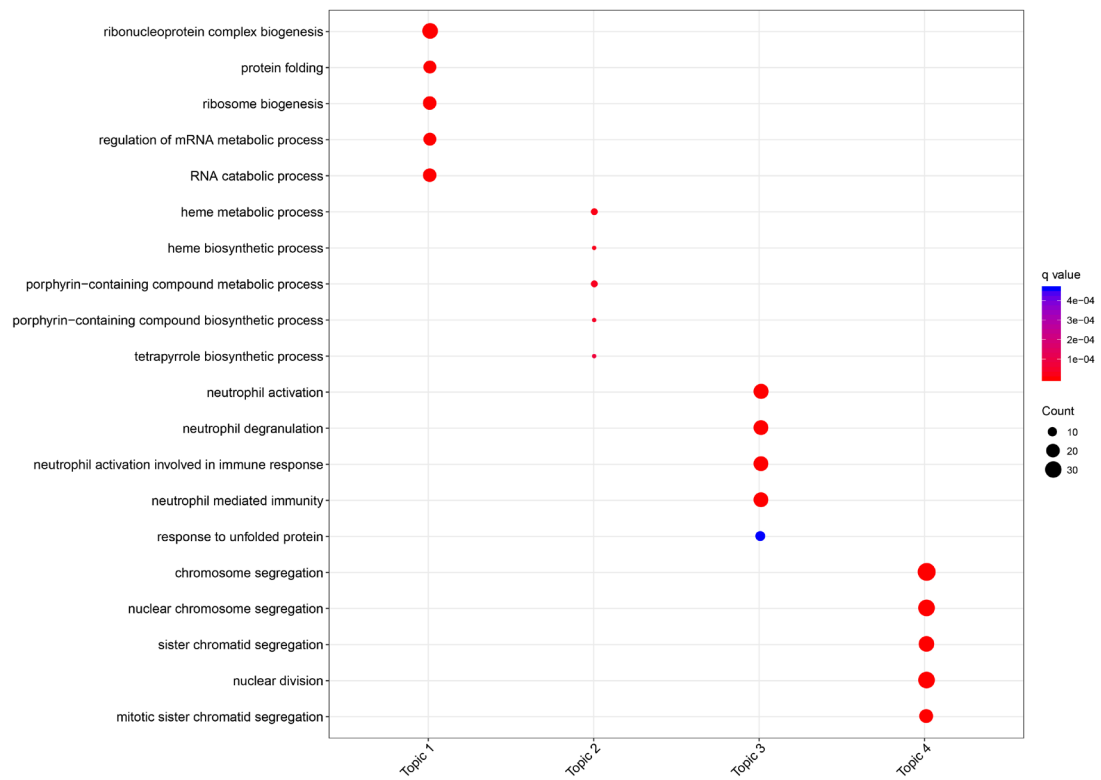

**Supplementary Figure 3** Functional annotation of topics for K562 with 7 days post transduction (GSM2396858).

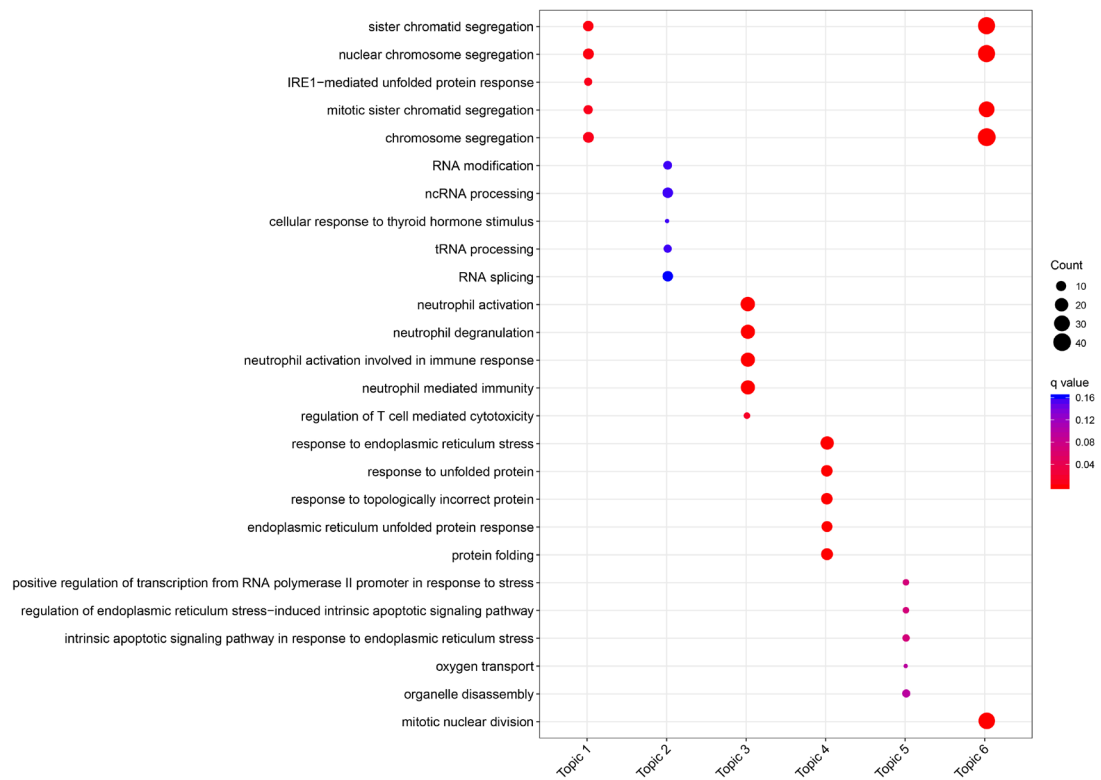

**Supplementary Figure 4** Functional annotation of topics for K562 with 13 days post transduction (GSM2396859).

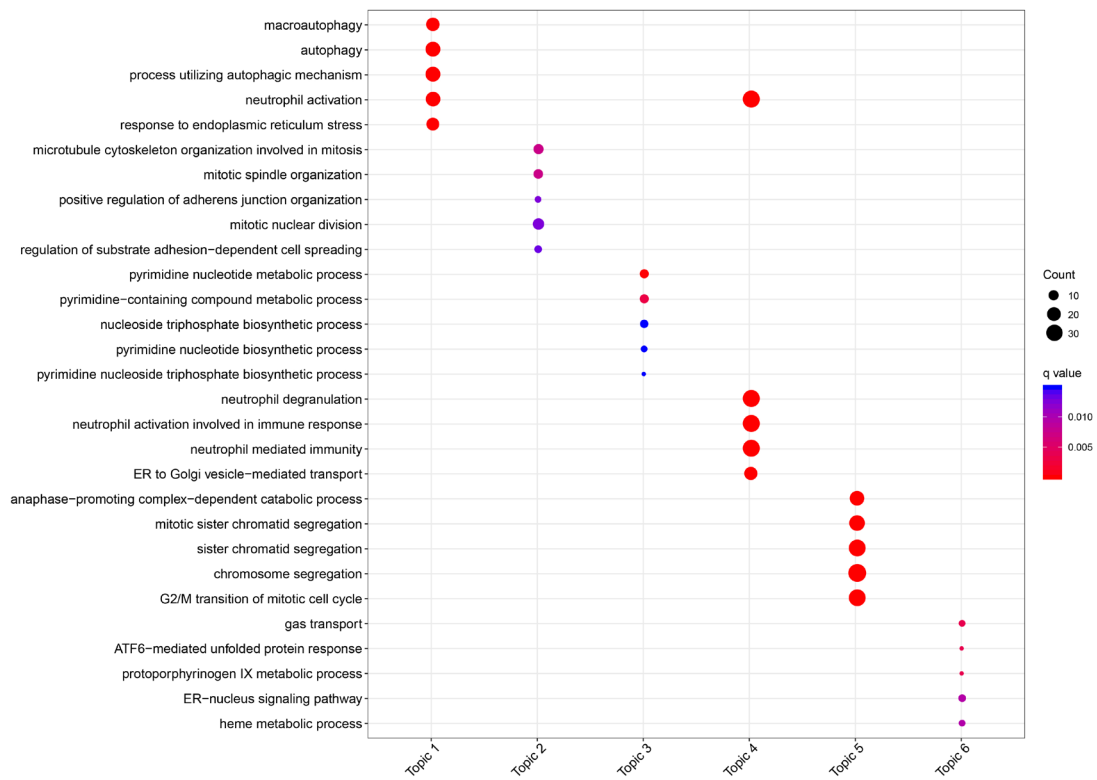

**Supplementary Figure 5** Functional annotation of topics for K562 with high MOI (GSM2396860).

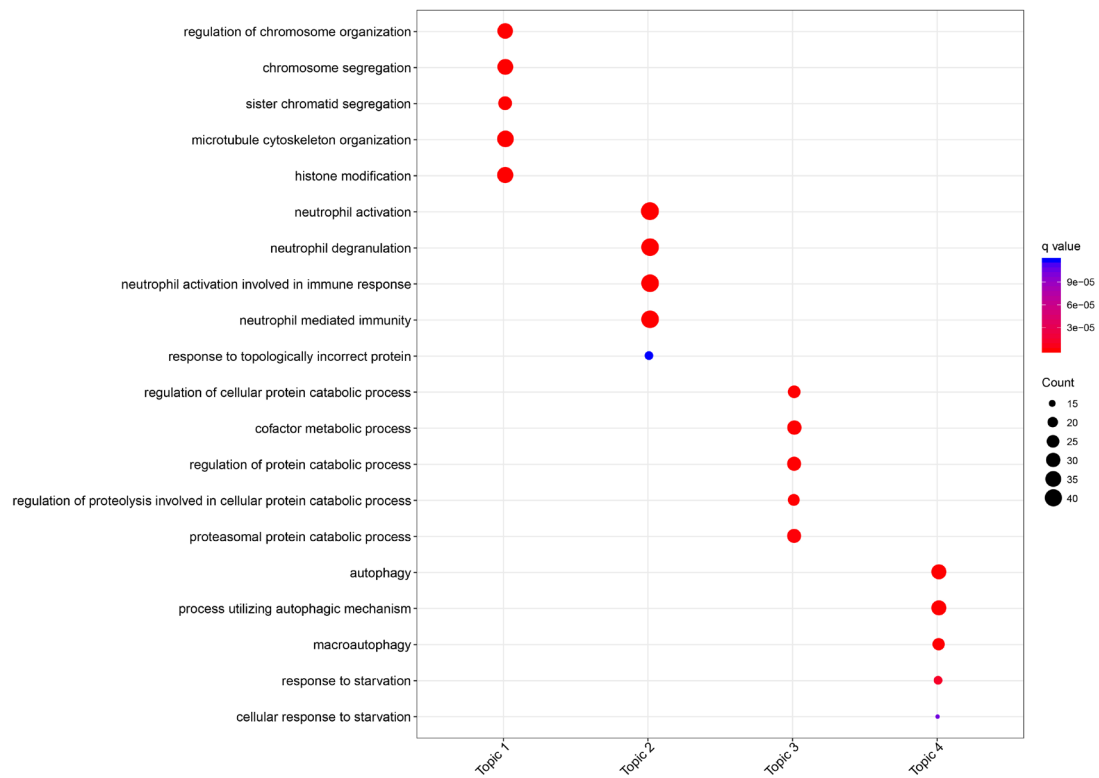

**Supplementary Figure 6** Functional annotation of topics for K562 with perturbation of cell cycle regulators (GSM2396861).

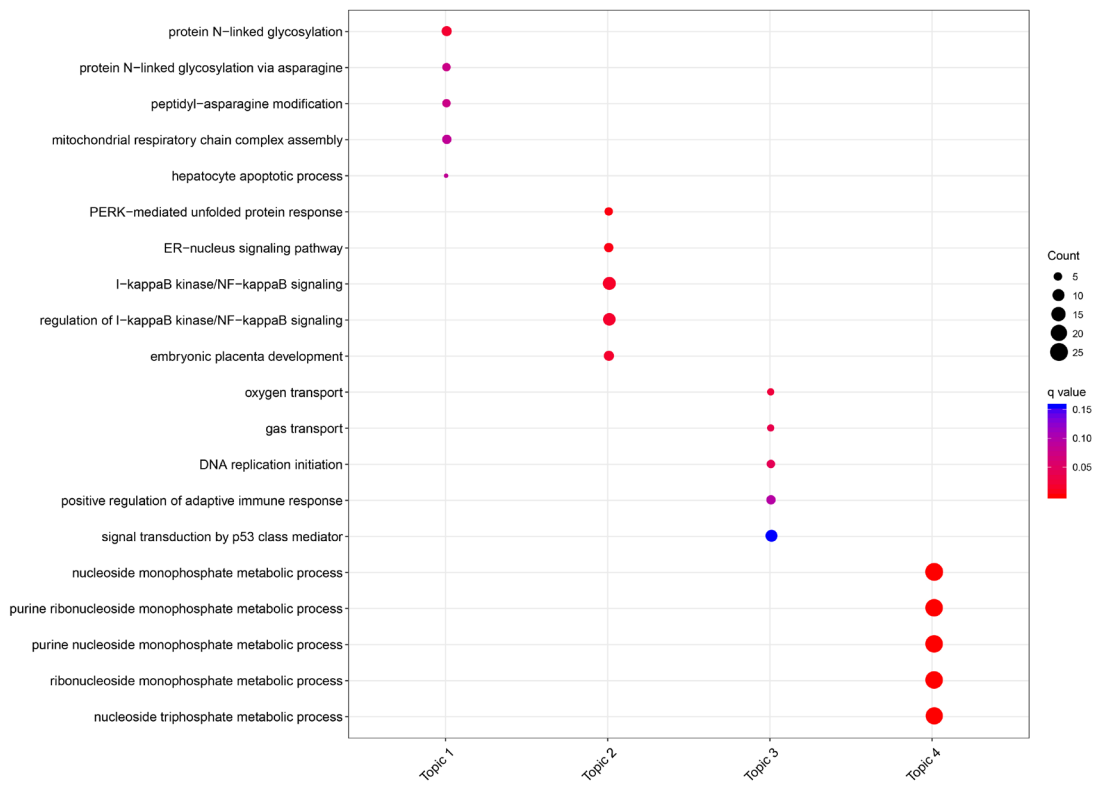

**Supplementary Figure 7** Functional annotation of topics for K562 cells (GSM2406675).



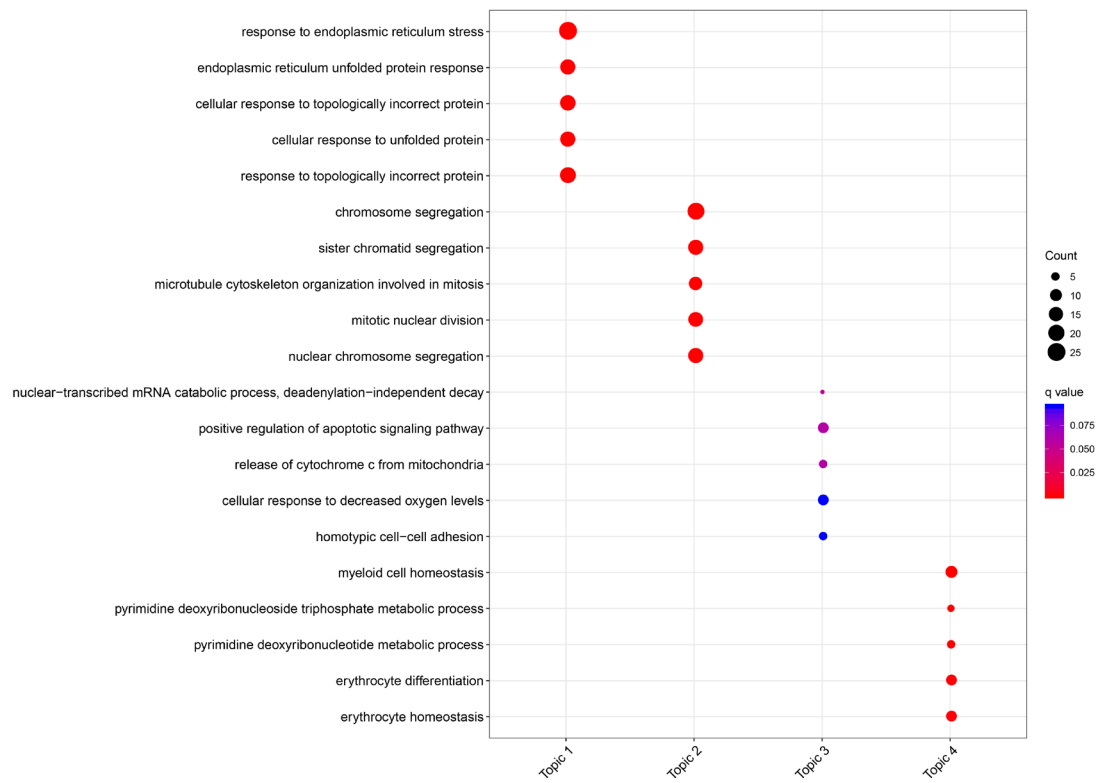

**Supplementary Figure 8** Functional annotation of topics for K562 with three UPR genes (GSM2406677).

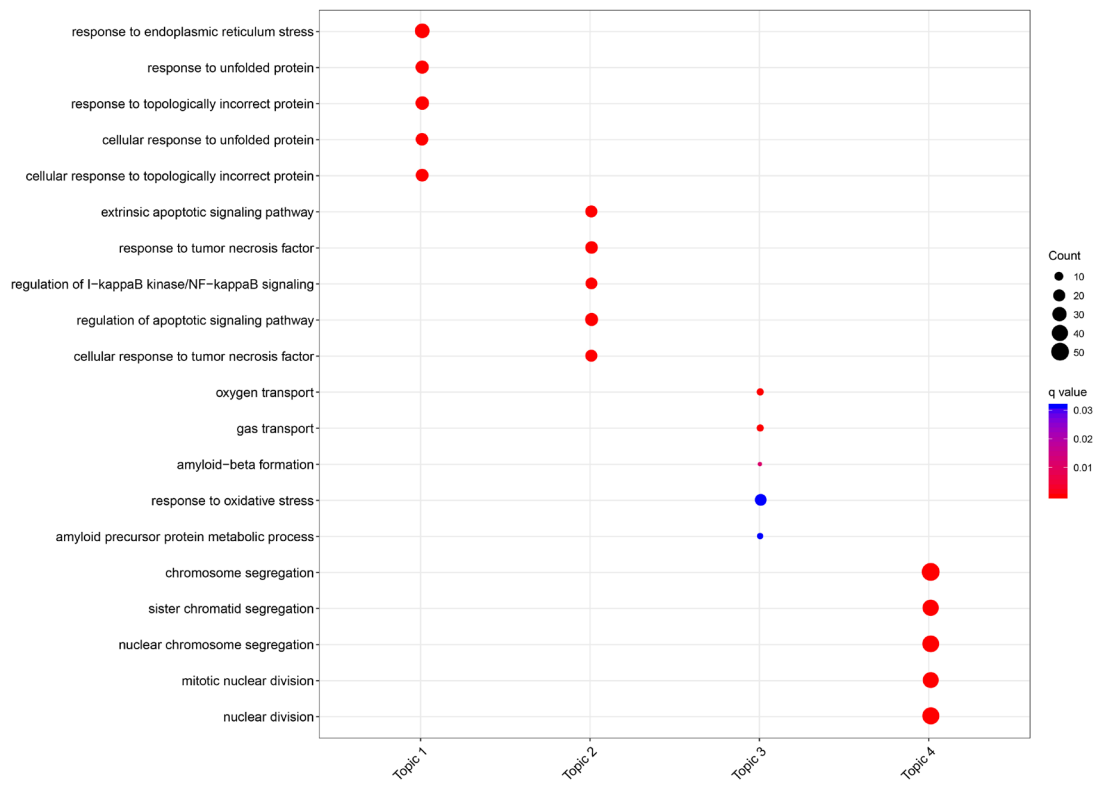

**Supplementary Figure 9** Functional annotation of topics for K562 with the perturbation of 83 UPR genes (GSM2406681).

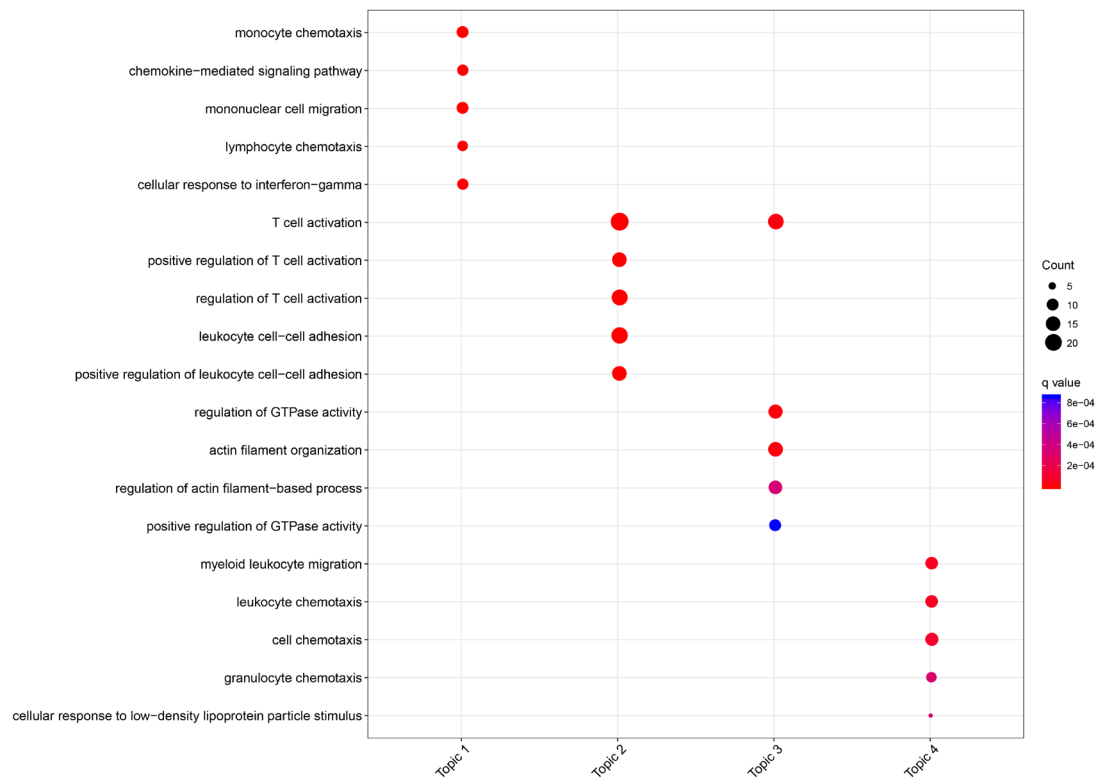

**Supplementary Figure 10** Functional annotation of topics for myeloid cells (GSE90486).

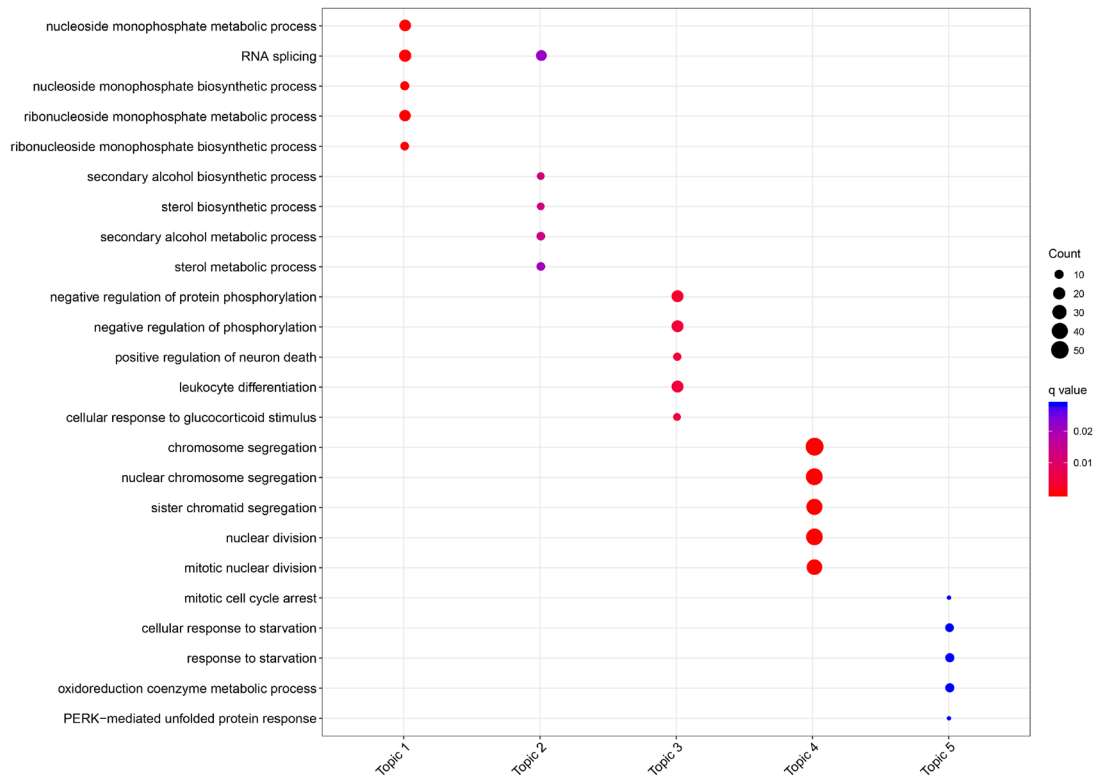

**Supplementary Figure 11** Functional annotation of topics for anti CD3/CD28 stimulated Jurkat cells (GSM2439080 ~ GSM2439085).

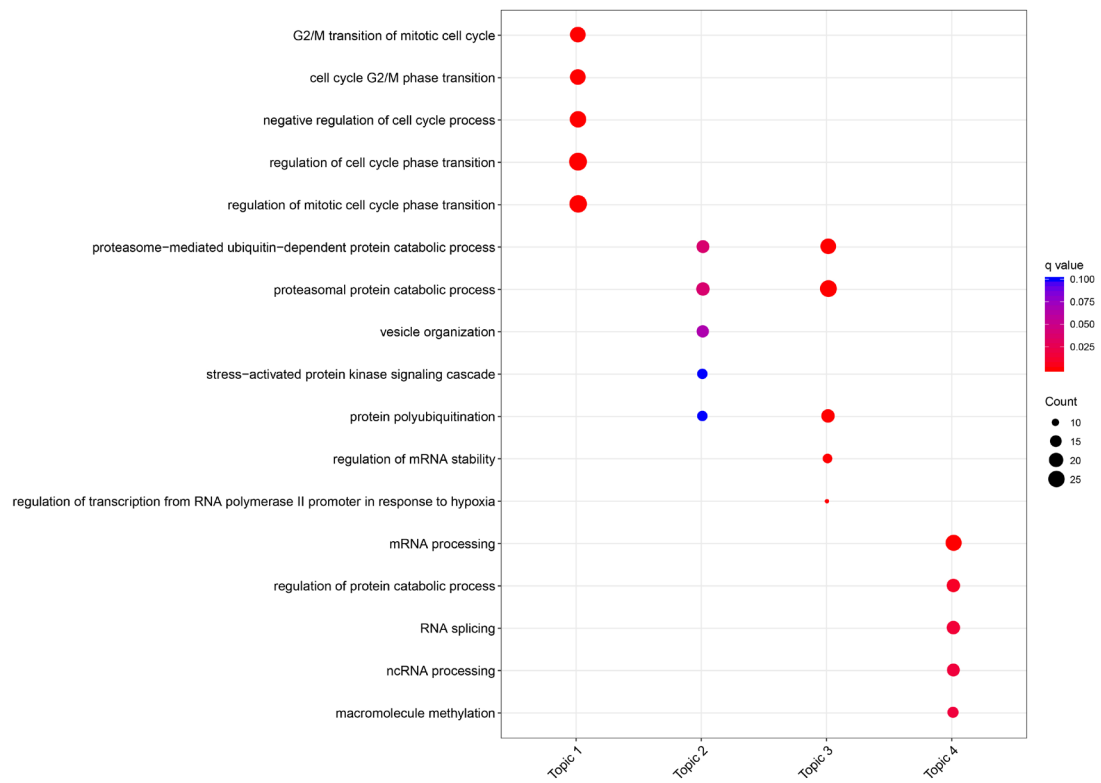

**Supplementary Figure 12** Functional annotation of topics for unstimulated Jurkat cells (GSM2439086 ~ GSM2439090).

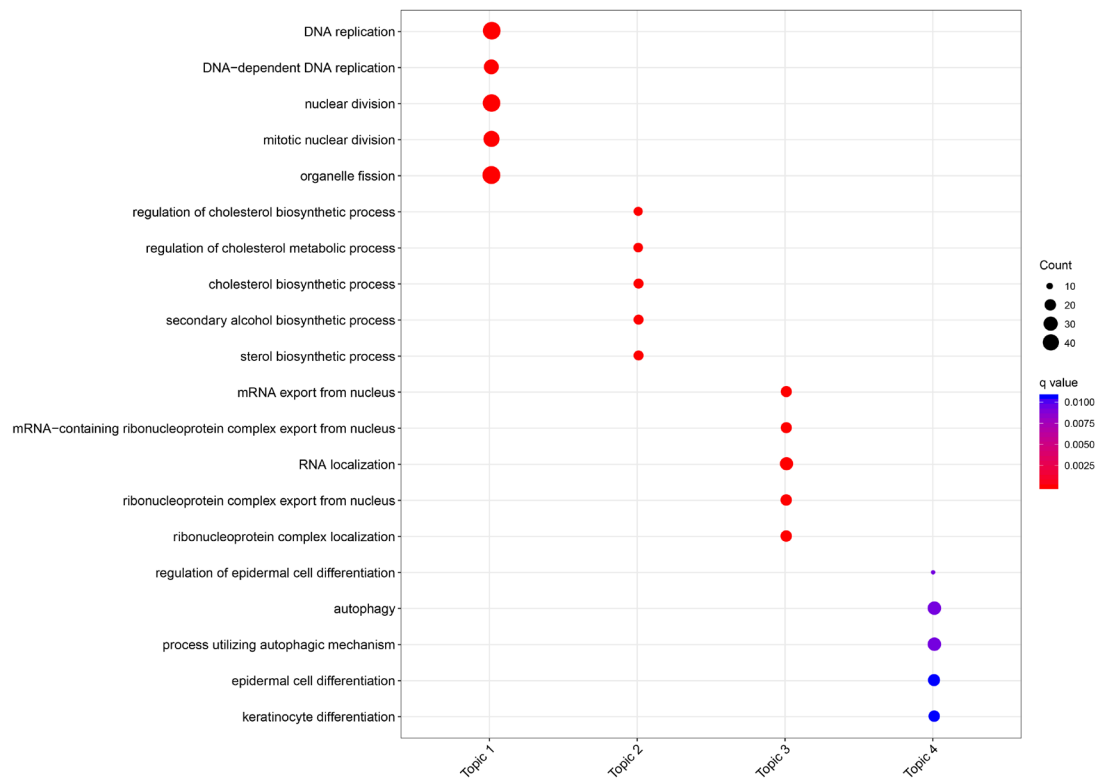

**Supplementary Figure 13** Functional annotation of topics for doxorubicin treated MCF10A (GSM2911346).

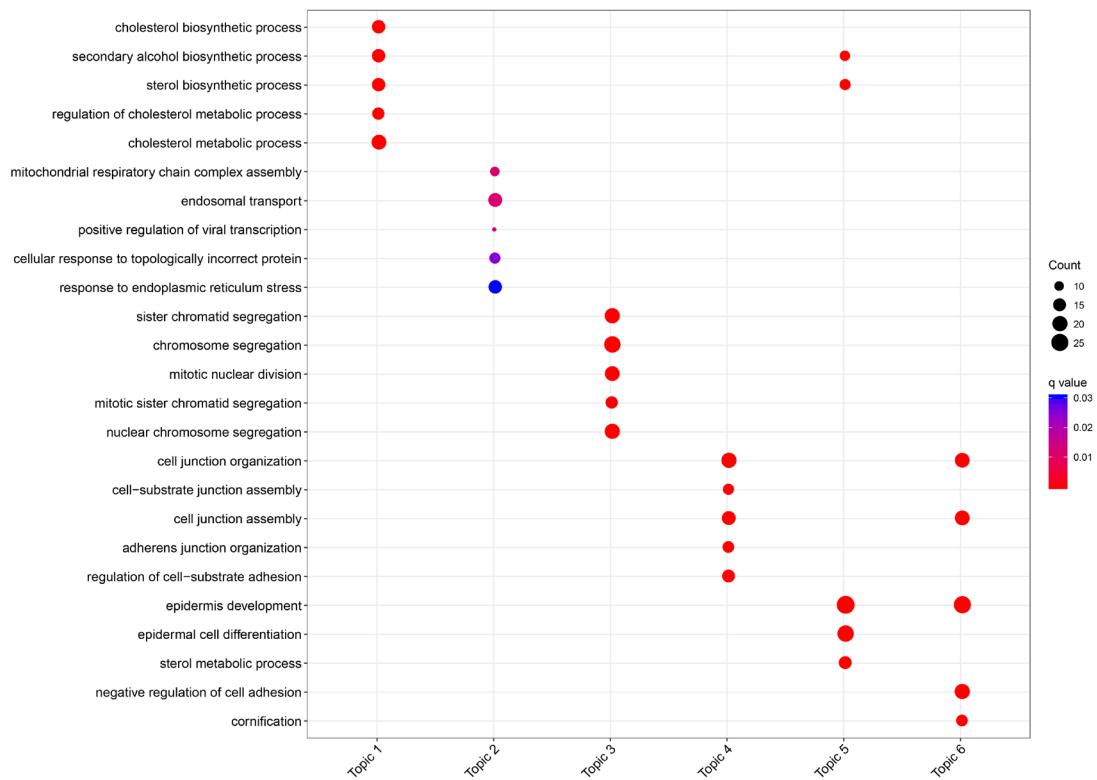

**Supplementary Figure 14** Functional annotation of topics for untreated MCF10A cells (GSM2911347).

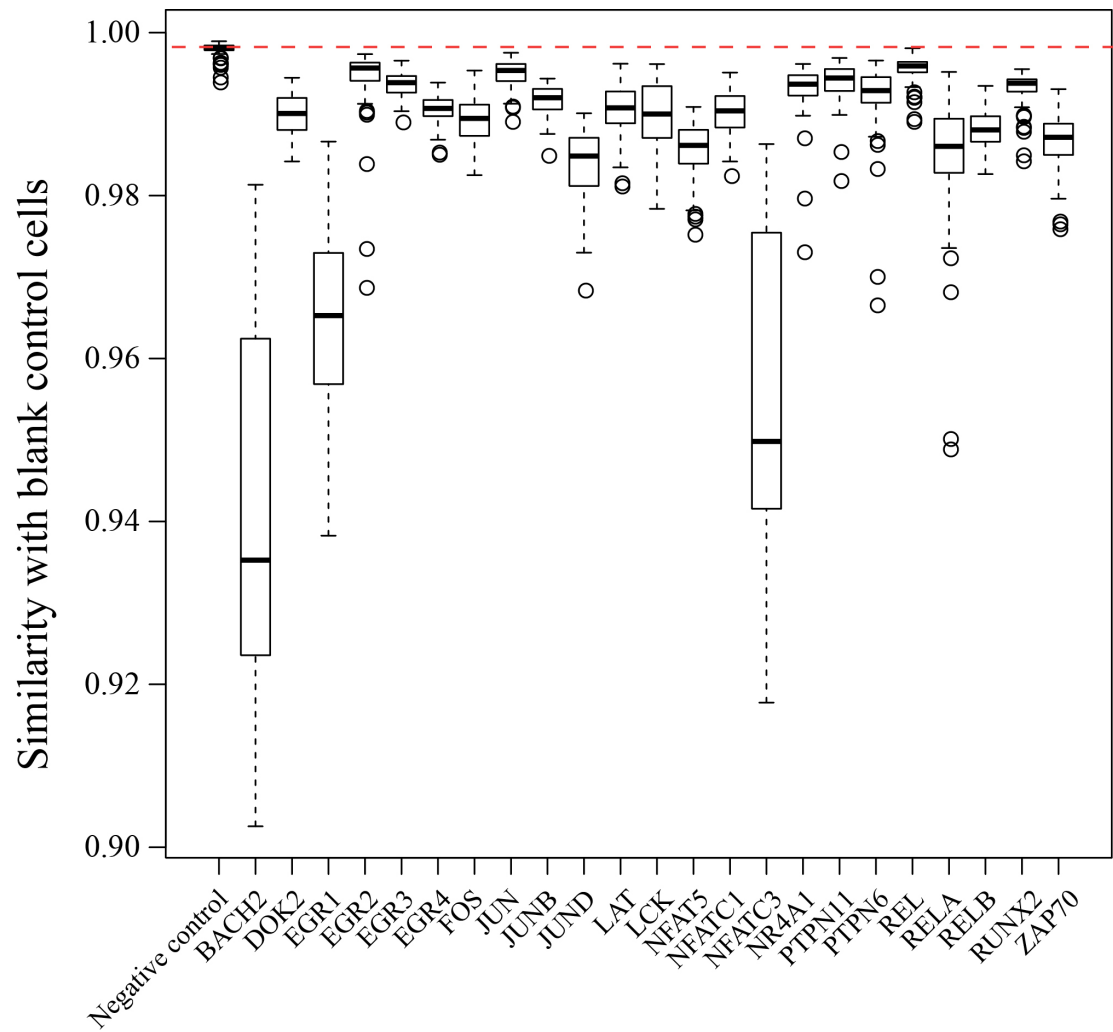

**Supplementary Figure 15** Comparisons of blank control with negative control and other knockouts for stimulated Jurkat cell dataset.



**Supplementary Table 1 Descriptions of all available single cell CRISPR screening datasets**

| Technology                               | GEO accession                 | Cell type     | Species | Gene perturbation                        | No. of cells induced with sgRNAs | Experimental conditions     |
|------------------------------------------|-------------------------------|---------------|---------|------------------------------------------|----------------------------------|-----------------------------|
| Perturb-Seq <sup>4</sup>                 | GSM2396856                    | BMDC          | Mouse   | 24 TFs                                   | 21984                            | 3 hr post-LPS               |
|                                          | GSM2396857                    | BMDC          | Mouse   | 24 TFs                                   | 24589                            | 0 hr post-LPS               |
|                                          | GSM2396858                    | K562          | Human   | 10 TFs                                   | 33013                            | 7 days post transduction    |
|                                          | GSM2396859                    | K562          | Human   | 10 TFs                                   | 19268                            | 13 days post transduction   |
|                                          | GSM2396860                    | K562          | Human   | 10 TFs                                   | 51898                            | Higher MOI of perturbations |
|                                          | GSM2396861                    | K562          | Human   | 13 cell-cycle regulators                 | 25971                            | -                           |
| Perturb-seq <sup>3</sup>                 | GSM2406675                    | K562          | Human   | 7 TFs                                    | 5321                             | -                           |
|                                          | GSM2406677                    | K562          | Human   | 3 UPR related genes                      | 13494                            | -                           |
|                                          | GSM2406681                    | K562          | Human   | 82 UPR related genes                     | 50467                            | -                           |
| CRISP-seq <sup>5</sup>                   | GSE90486                      | Myeloid cells | Mouse   | 22 TFs                                   | 4977                             | 4 hr post-LPS               |
| CROP-seq <sup>6</sup>                    | GSM2439080<br>~<br>GSM2439085 | Jurkat cells  | Human   | 6 regulators of TCR signaling and 23 TFs | 3259                             | Stimulated by anti-CD3/CD28 |
|                                          | GSM2439086<br>~<br>GSM2439090 | Jurkat cells  | Human   | 6 regulators of TCR signaling and 23 TFs | 2646                             | -                           |
| Updated version of CROP-seq <sup>7</sup> | GSM2911346                    | MCF10 A       | Human   | 29 tumor suppressors                     | 6283                             | Treated with doxorubicin    |
|                                          | GSM2911347                    | MCF10 A       | Human   | 29 tumor suppressors                     | 6598                             | -                           |

**Supplementary Table 2 Comparison of gene relationships calculated with or without imputation, with or without filtering**

| Relationship | Prior knowledge     | Data preprocessing strategies |                |                 |                      |
|--------------|---------------------|-------------------------------|----------------|-----------------|----------------------|
|              |                     | None                          | Filtering only | Imputation only | Imputation+filtering |
| Runx1-Cebpb  | Negative regulation | -0.03                         | -0.16          | -0.67           | -0.99                |
| Irf4-Cebpb   | Negative regulation | -0.1                          | -0.45          | -0.63           | -0.99                |
| Nfkb1-Cebpb  | Negative regulation | 0.25                          | -0.32          | -0.38           | -0.99                |
| Spi1-Cebpb   | Negative regulation | 0.3                           | -0.39          | -0.67           | -0.96                |
| Junb-Cebpb   | Positive regulation | 0.69                          | 0.07           | 0.37            | 0.93                 |
| Hif1a-Cebpb  | Positive regulation | 0.63                          | 0.65           | 0.58            | 0.98                 |
| Stat3-Cebpb  | Positive regulation | 0.62                          | 0.77           | 0.33            | 0.99                 |
| Rela-Cebpb   | Positive regulation | 0.77                          | 0.89           | 0.54            | 0.99                 |

**Supplementary Table 3 Comparison of overall perturbation effect ranking identified by MUSIC or simply based on the number of differentially expressed genes. (DEG, differentially expressed genes calculated by Kolmogorov-Smirnov test. Perturb score, the TPDS defined in MUSIC as discussed in Methods)**

| Judging Criteria   | Perturbation |           |      |
|--------------------|--------------|-----------|------|
|                    | PERK-IRE1    | PERK-ATF6 | PERK |
| Perturb score      | 109          | 103       | 93   |
| No. Of DEG(p<0.05) | 8414         | 8165      | 8386 |
| No. Of DEG(p<0.01) | 7899         | 7614      | 7816 |

**Supplementary Table 4 Comparison of gene-by-gene correlations identified by MUSIC or by clustering RNA-seq profiles**

| Relationship | Prior knowledge     | Strategies                  |       |
|--------------|---------------------|-----------------------------|-------|
|              |                     | Clustering RNA-seq profiles | MUSIC |
| Runx1-Cebpb  | Negative regulation | 0.57                        | -0.99 |
| Irf4-Cebpb   | Negative regulation | 0.55                        | -0.99 |
| Nfkb1-Cebpb  | Negative regulation | 0.55                        | -0.99 |
| Spi1-Cebpb   | Negative regulation | 0.49                        | -0.96 |
| Junb-Cebpb   | Positive regulation | 0.97                        | 0.93  |
| Hif1a-Cebpb  | Positive regulation | 0.92                        | 0.98  |
| Stat3-Cebpb  | Positive regulation | 0.97                        | 0.99  |
| Rela-Cebpb   | Positive regulation | 0.9                         | 0.99  |
