# Supplementary material for: Model-based understanding of single-cell CRISPR screening
Source: PubMed Central journal article supplement (PMC6527552; doi:10.1038/s41467-019-10216-x), 2019-05-20
Supplement: 41467_2019_10216_MOESM3_ESM.pdf [file 41467_2019_10216_MOESM3_ESM.pdf]

## Description of Additional Supplementary Files

### **Supplementary Data 1**

Perturbation effect prioritizing result for BMDC with 3 hr post-LPS (GSM2396856).

### **Supplementary Data 2**

Perturbation effect prioritizing result for unstimulated BMDC (GSM2396857).

### **Supplementary Data 3**

Perturbation effect prioritizing result for K562 with 7 days post transduction (GSM2396858).

### **Supplementary Data 4**

Perturbation effect prioritizing result for K562 with 13 days post transduction (GSM2396859).

### **Supplementary Data 5**

Perturbation effect prioritizing result for K562 with high MOI (GSM2396860).

### **Supplementary Data 6**

Perturbation effect prioritizing result for K562 with perturbation of cell cycle regulators (GSM2396861).

### **Supplementary Data 7**

Perturbation effect prioritizing result for K562 cells (GSM2406675).

### **Supplementary Data 8**

Perturbation effect prioritizing result for K562 with three UPR genes (GSM2406677).

### **Supplementary Data 9**

Perturbation effect prioritizing result for K562 with the perturbation of 83 UPR genes (GSM2406681).

### **Supplementary Data 10**

Perturbation effect prioritizing result for myeloid cells (GSE90486).

### **Supplementary Data 11**

Perturbation effect prioritizing result for anti CD3/CD28 stimulated Jurkat cells (GSM2439080 ~ GSM2439085).

### **Supplementary Data 12**

Perturbation effect prioritizing result for unstimulated Jurkat cells (GSM2439086 ~ GSM2439090).

### **Supplementary Data 13**

Perturbation effect prioritizing result for doxorubicin treated MCF10A (GSM2911346).

### **Supplementary Data 14**

Perturbation effect prioritizing result for untreated MCF10A cells (GSM2911347).

### **Supplementary Data 15**

The proportion of filtered cells by filtering low efficiency sgRNA for all data sets.

### **Supplementary Data 16**

Zero rate of all knockouts/knockdowns in all datasets.

### **Supplementary Data 17**

Comparisons of overall perturbation effect ranking with or without imputation/filtering for all the available datasets.
